# Supplementary material for: Evaluation of Li2SnO3:Cr3+, Mn4+ as a dual-emitter luminescence sensor for cryogenic temperatures
Source: Royal Society of Chemistry journal article supplement (doi:10.1039/d3tc03913g), 2023-12-22
Supplement: d3tc03913g1.pdf [file d3tc03913g1.pdf]

## SUPPORTING INFORMATION

Two EPR spectra for  $\text{Li}_2\text{SnO}_3$  compound doped with  $\text{Cr}^{3+}$  and  $\text{Mn}^{4+}$  ions at room temperature and  $T = 80$  K are shown in Figure S1.

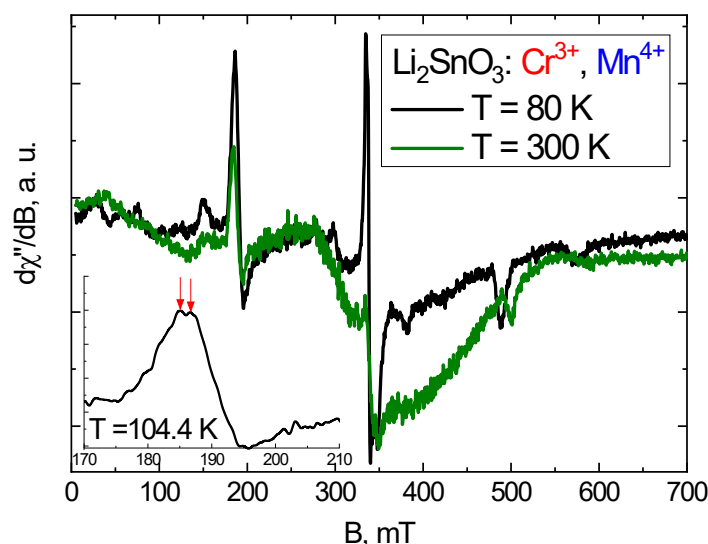

Fig. S1. EPR spectra of the compound  $\text{Li}_2\text{SnO}_4$  doped with  $\text{Cr}^{3+}$  and  $\text{Mn}^{4+}$  ions for two selected temperatures  $T = 80$  K and  $T = 300$  K. The inset shows a fragment of the spectrum at  $T = 104.4$  K. The red arrows indicate the intensity maxima of the EPR lines at  $g_{\text{eff}} \sim 3.6$ .

The temperature dependence of the EPR magnetic susceptibility can be described by the Curie-Weiss equation using the following equation [24]:

$$\chi = \frac{C}{T - T_{\text{CW}}}, \quad (\text{S1})$$

where  $C$  is a constant value and  $T_{\text{CW}}$  is the Curie-Weiss temperature (see Figs. S2a and S2b). To distinguish between contributions from  $\text{Cr}^{3+}$  and  $\text{Mn}^{4+}$  ions the EPR spectra were deconvoluted using SH parameter fits. The magnetic susceptibility was then determined by calculating the area under the absorption curve of  $\text{Cr}^{3+}$  and  $\text{Mn}^{4+}$  ions in the experimental EPR spectra. The magnitude and sign of the  $T_{\text{CW}}$  indicate the strength and nature of the interactions between the paramagnetic ions. The temperature studies reveal weak antiferromagnetic interactions among  $\text{Cr}^{3+}$  ions (indicated by a negative  $T_{\text{CW}}$  value) while ferromagnetic interactions (indicated by a positive  $T_{\text{CW}}$  value) are observed among  $\text{Mn}^{4+}$  ions. The difference in interaction strength between  $\text{Cr}^{3+}$  and  $\text{Mn}^{4+}$  ions is due to the difference in ionic radii between these ions.

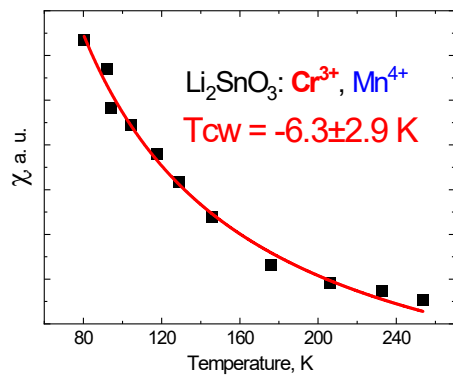

a)

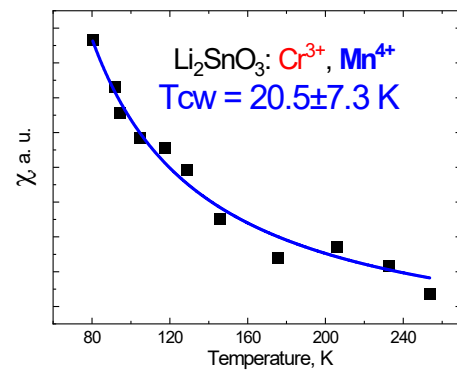

b)

Fig. S2. Temperature dependence of magnetic susceptibility for  $\text{Cr}^{3+}$  (a) and  $\text{Mn}^{4+}$  (b) ions in the  $\text{Li}_2\text{SnO}_3$  compound and fitting of the Curie-Weiss equation to experimental data.
